# Supplementary material for: New Prenylxanthones from the Deep-Sea Derived Fungus Emericella sp. SCSIO 05240
Source: MDPI journal article supplement (doi:10.3390/md12063190), 2014-05-28

## Supplementary Information

**Figure S1.**  $^1\text{H}$  NMR (500 MHz,  $\text{CDCl}_3$ ) spectrum of compound **1**.

**Figure S2.**  $^{13}\text{C}$  NMR (125 MHz,  $\text{CDCl}_3$ ) spectrum of compound **1**.

**Figure S3.** Dept 135 (125 MHz,  $\text{CDCl}_3$ ) spectrum of compound **1**.

**Figure S4.** HSQC spectrum of compound **1**.

**Figure S5.** HMBC spectrum of compound **1**.

**Figure S6.**  $^1\text{H}$ - $^1\text{H}$  COSY spectrum of compound **1**.

**Figure S7.** UV spectrum of compound **1**.

**Figure S8.** IR spectrum of compound **1**.

**Figure S9.** HRESI-MS of compound **1**.

**Figure S10.**  $^1\text{H}$  NMR (500 MHz,  $\text{CDCl}_3$ ) spectrum of compound **2**.

**Figure S11.**  $^{13}\text{C}$  NMR (125 MHz,  $\text{CDCl}_3$ ) spectrum of compound **2**.

**Figure S12.** Dept 135 (125 MHz,  $\text{CDCl}_3$ ) spectrum of compound **2**.

**Figure S13.** UV spectrum of compound **2**.

**Figure S14.** IR spectrum of compound **2**.

**Figure S15.** HRESI-MS of compound **2**.

**Figure S16.**  $^1\text{H}$  NMR (500 MHz,  $\text{CDCl}_3$ ) spectrum of compound **3**.

**Figure S17.**  $^{13}\text{C}$  NMR (125 MHz,  $\text{CDCl}_3$ ) spectrum of compound **3**.

**Figure S18.** UV spectrum of compound **3**.

**Figure S19.** IR spectrum of compound **3**.

**Figure S20.** HRESI-MS of compound **3**.

**Figure S21.**  $^1\text{H}$  NMR (500 MHz,  $\text{CDCl}_3$ ) spectrum of compound **4**.

**Figure S22.**  $^{13}\text{C}$  NMR (125 MHz,  $\text{CDCl}_3$ ) spectrum of compound **4**.

**Figure S23.** Dept 135 (125 MHz,  $\text{CDCl}_3$ ) spectrum of compound **4**.

**Figure S24.** HSQC spectrum of compound **4**.

**Figure S25.** HMBC spectrum of compound **4**.

**Figure S26.** UV spectrum of compound **4**.

**Figure S27.** IR spectrum of compound **4**.

**Figure S28.** HRESI-MS of compound **4**.

**Figure S1.**  $^1\text{H}$  NMR (500 MHz,  $\text{CDCl}_3$ ) spectrum of compound **1**.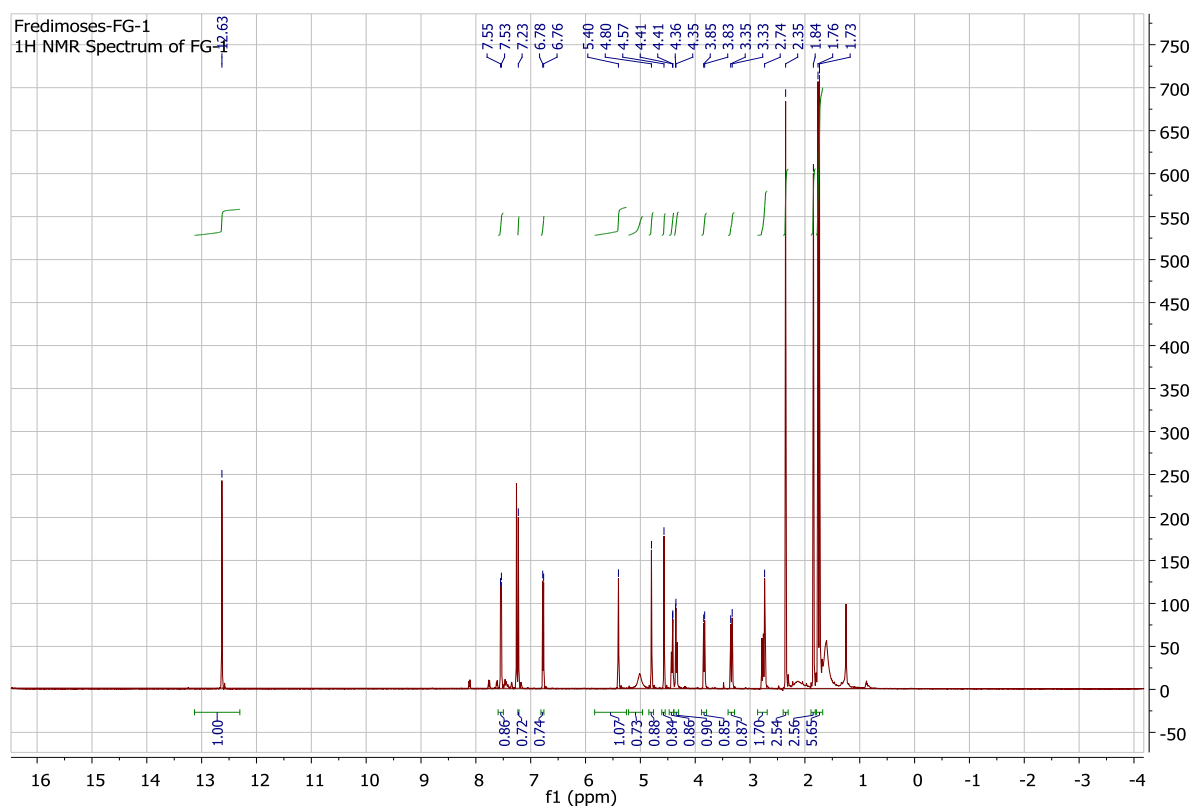**Figure S2.**  $^{13}\text{C}$  NMR (125 MHz,  $\text{CDCl}_3$ ) spectrum of compound **1**.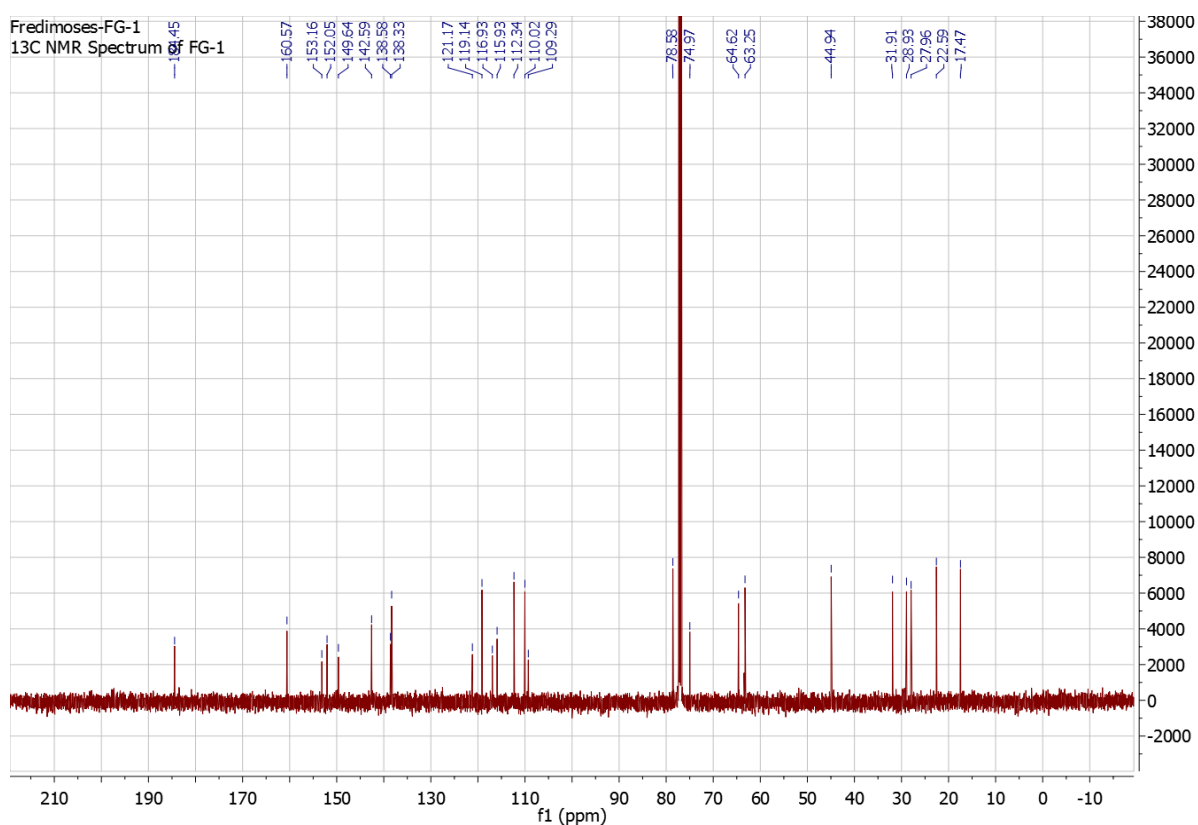

**Figure S3.** Dept 135 (125 MHz, CDCl<sub>3</sub>) spectrum of compound 1.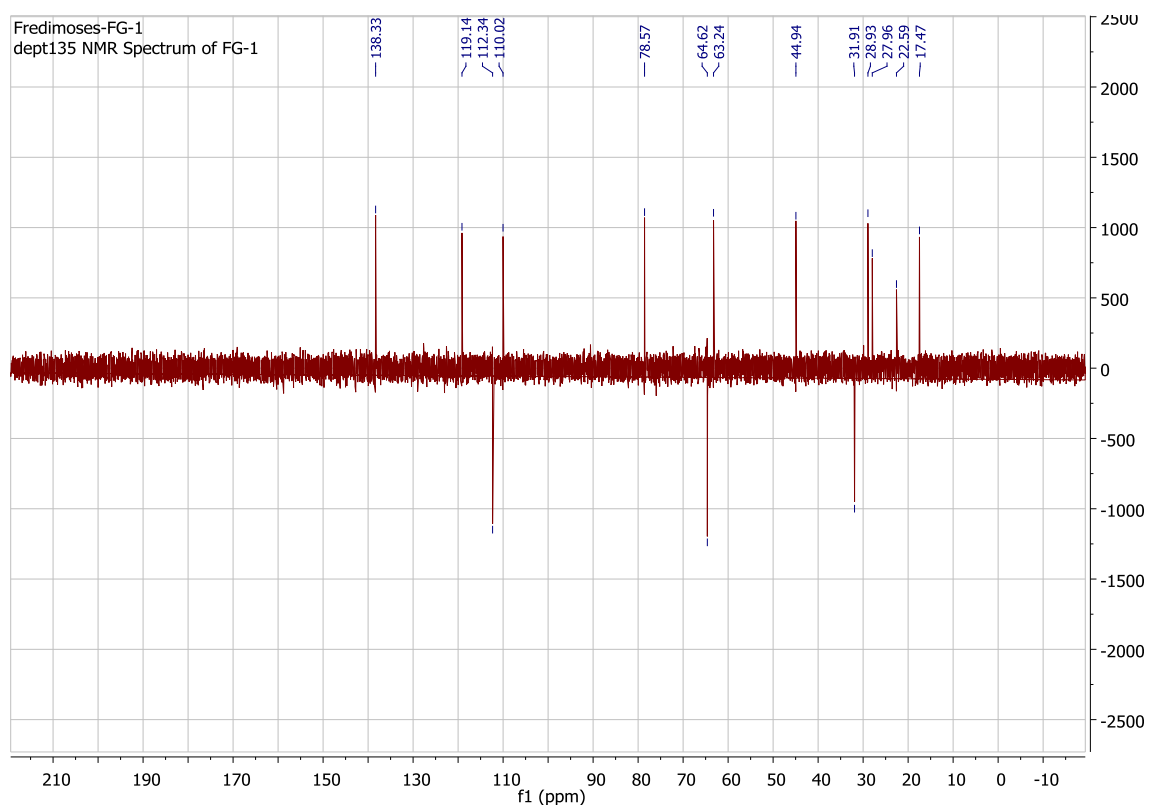**Figure S4.** HSQC spectrum of compound 1.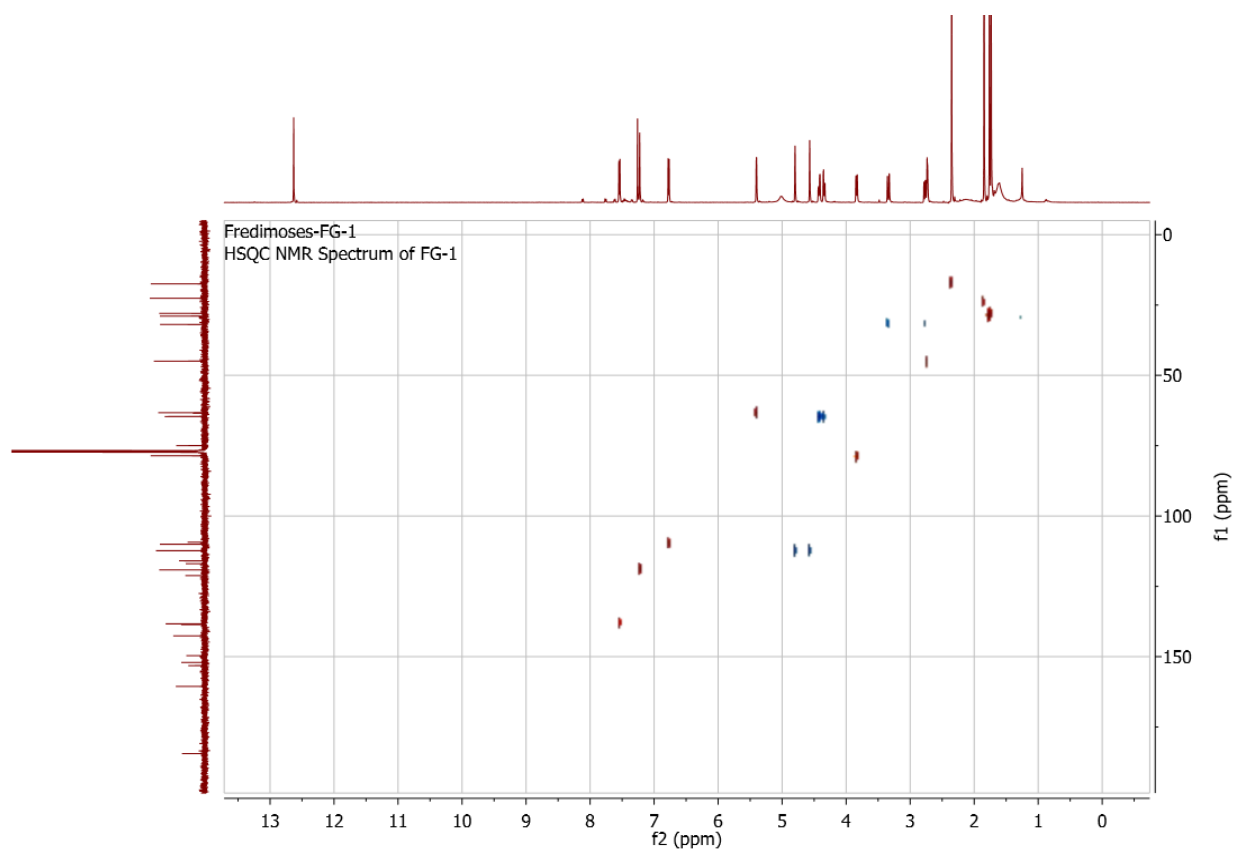

**Figure S5.** HMBC spectrum of compound **1**.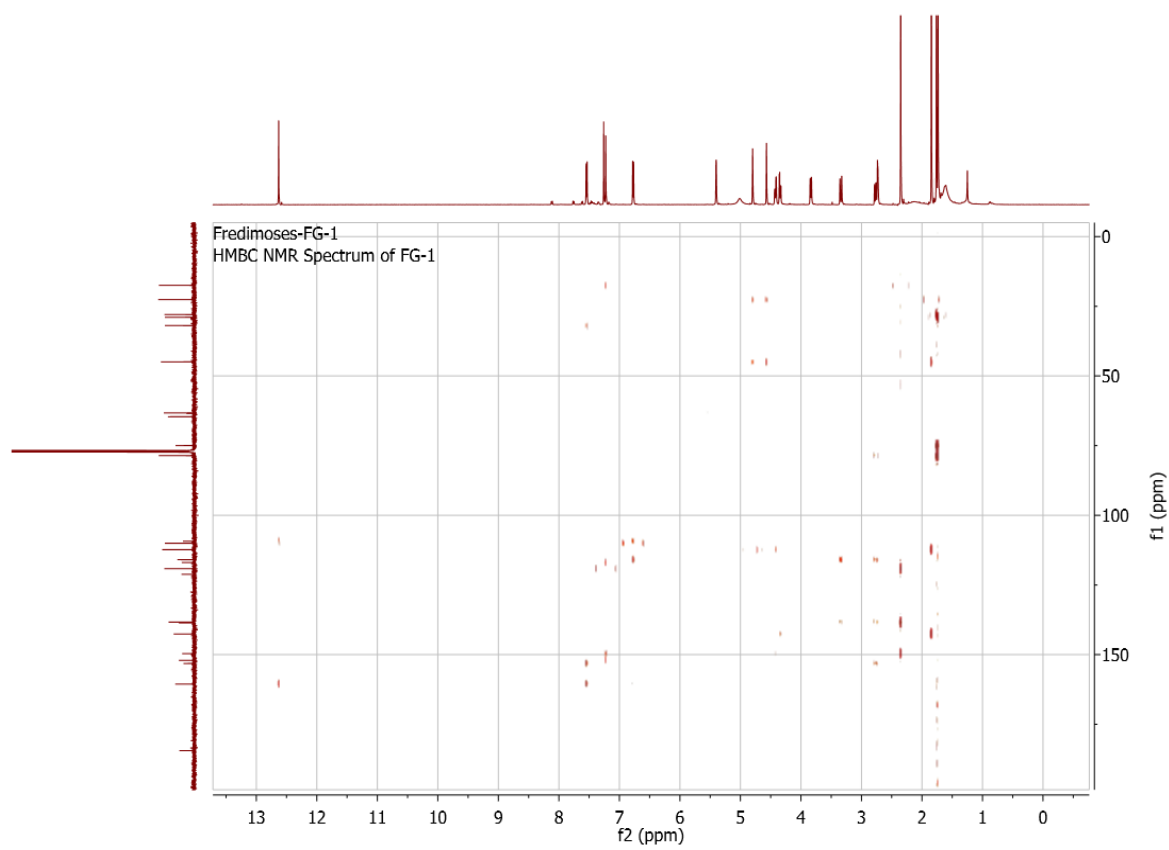**Figure S6.**  $^1\text{H}$ - $^1\text{H}$  COSY spectrum of compound **1**.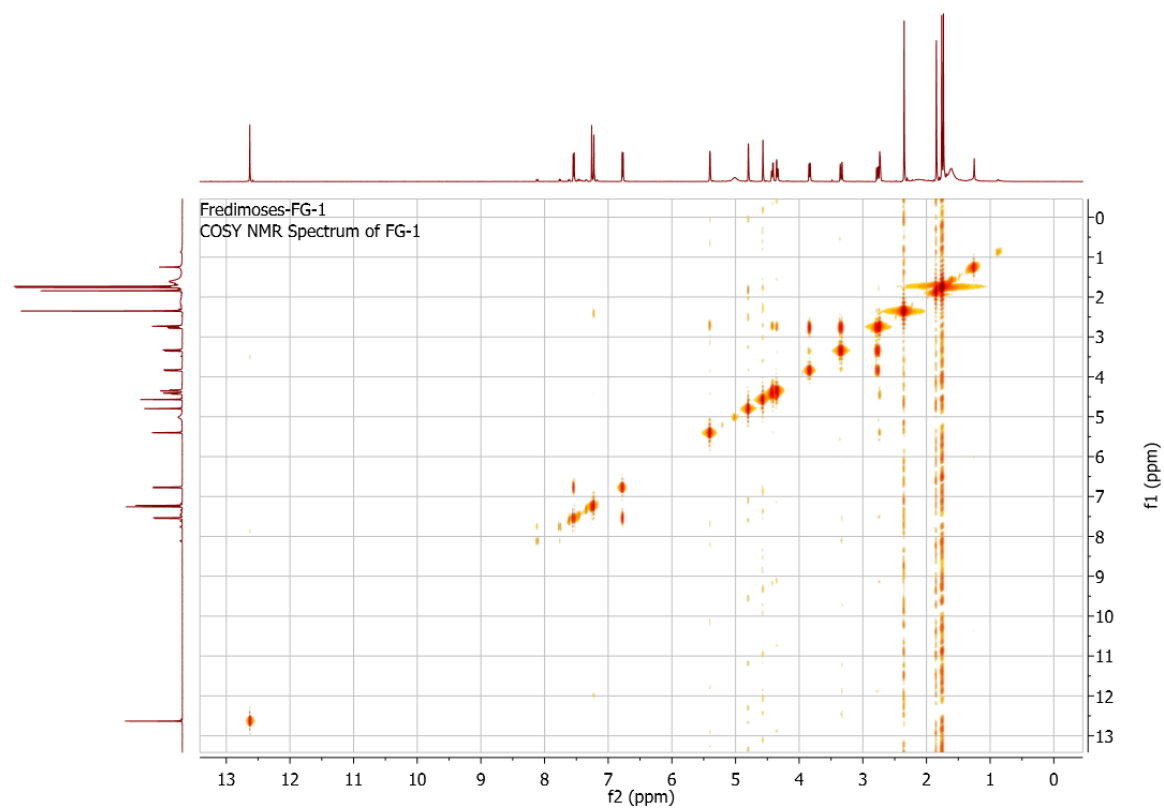

Figure S7. UV spectrum of compound 1.

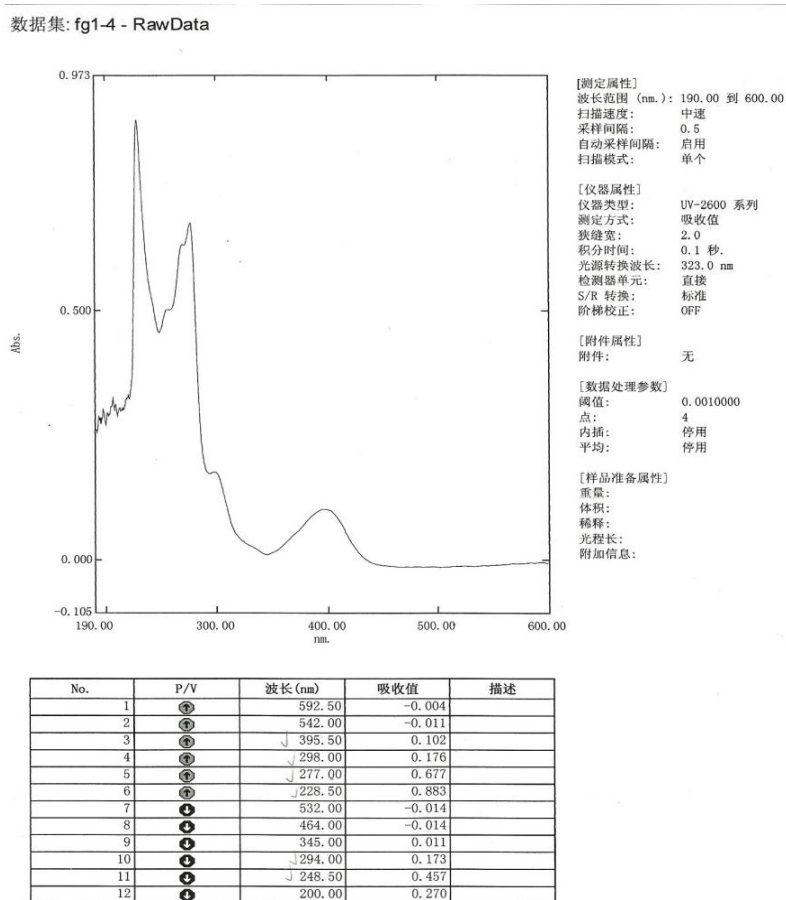

Figure S8. IR spectrum of compound 1.

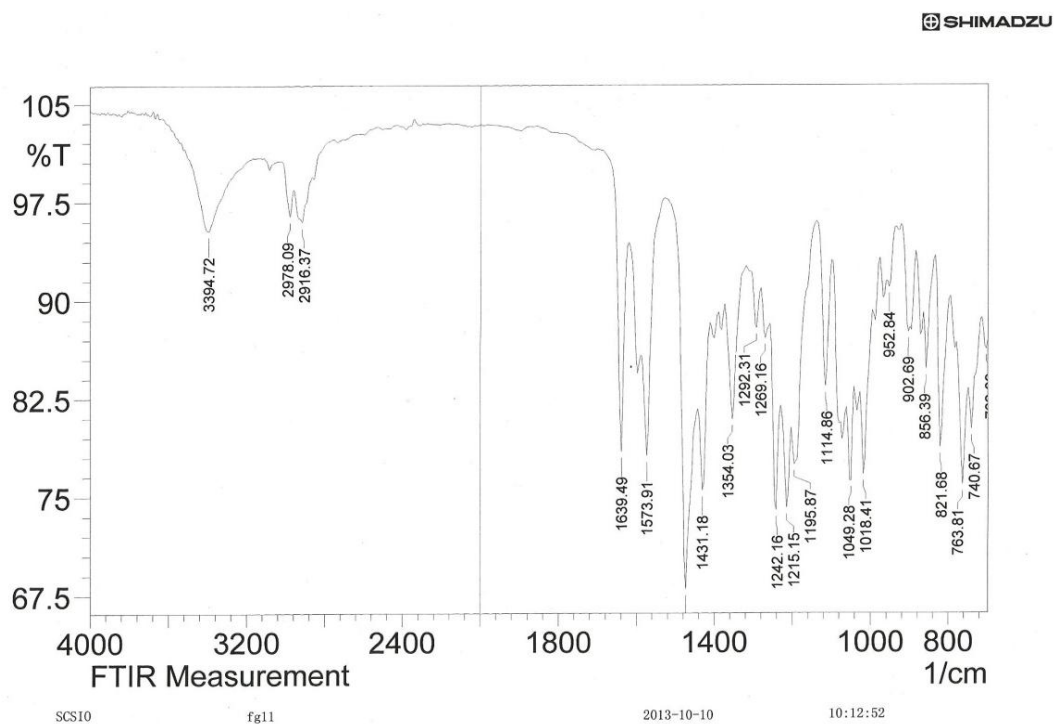

Figure S9. HRESI-MS of compound 1.

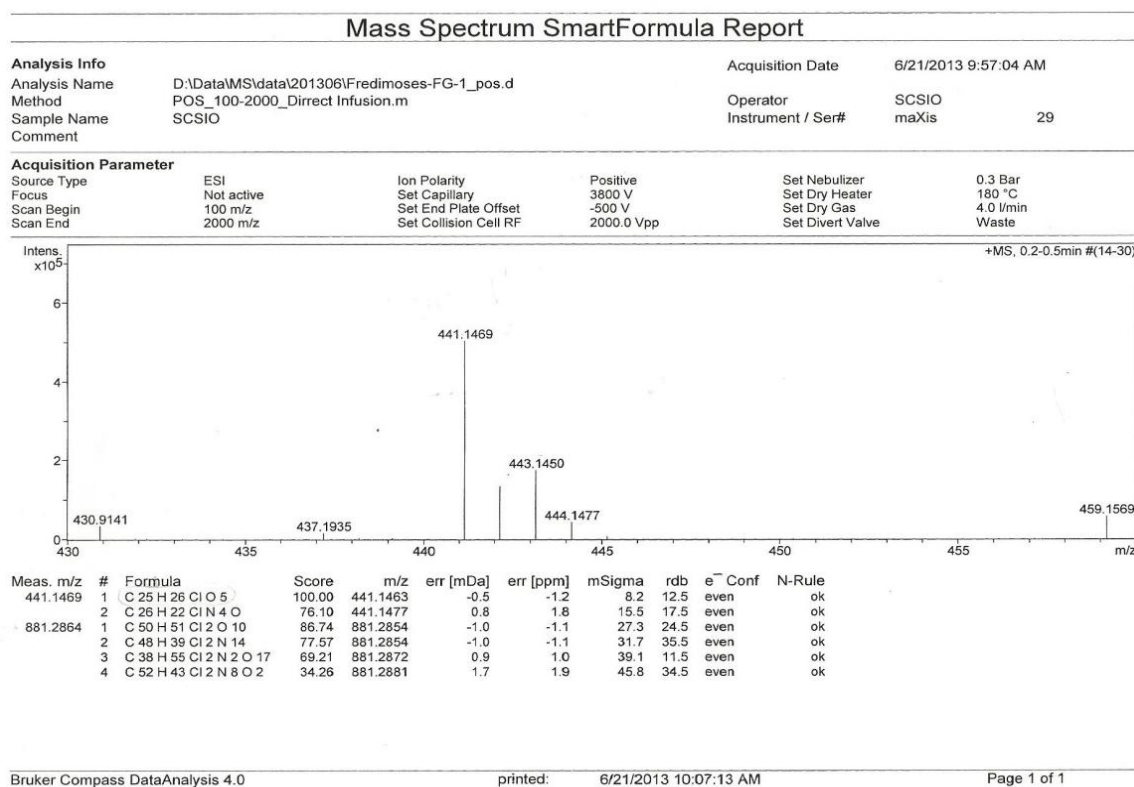Figure S10. <sup>1</sup>H NMR (500 MHz, CDCl<sub>3</sub>) spectrum of compound 2.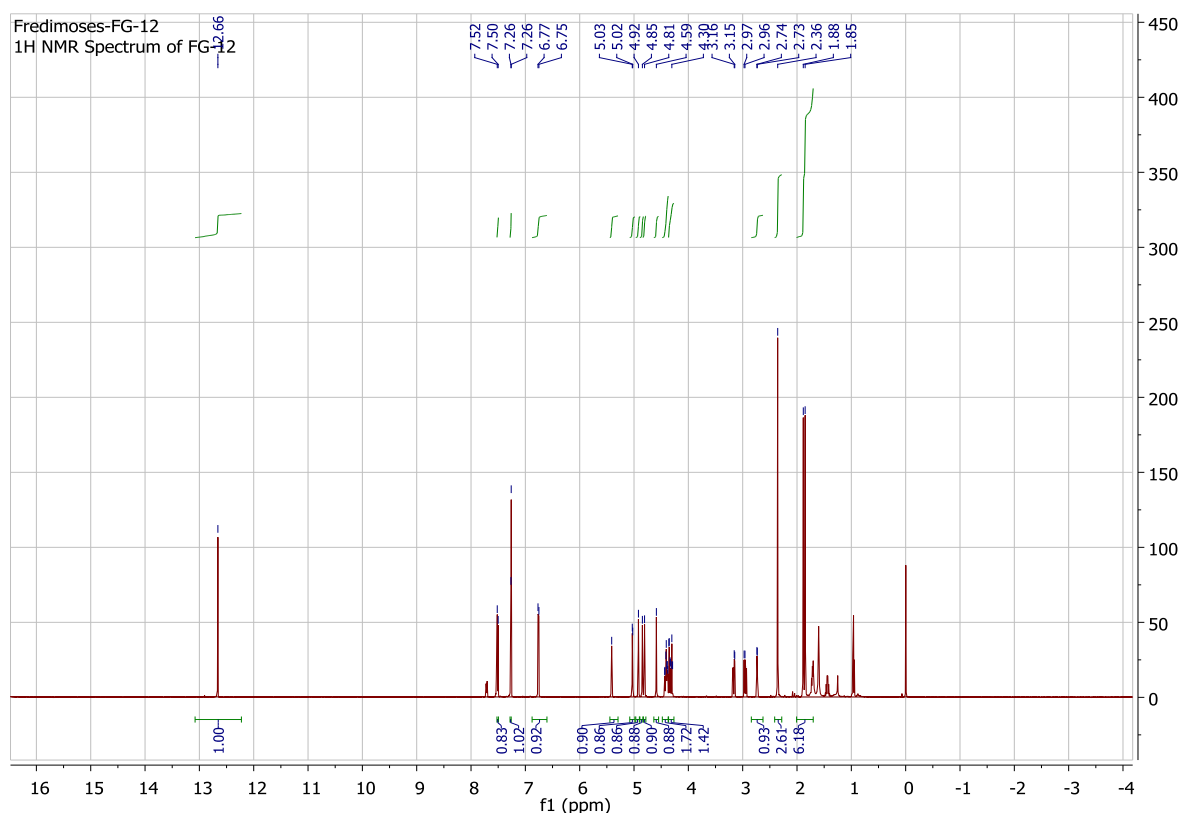

**Figure S11.**  $^{13}\text{C}$  NMR (125 MHz,  $\text{CDCl}_3$ ) spectrum of compound **2**.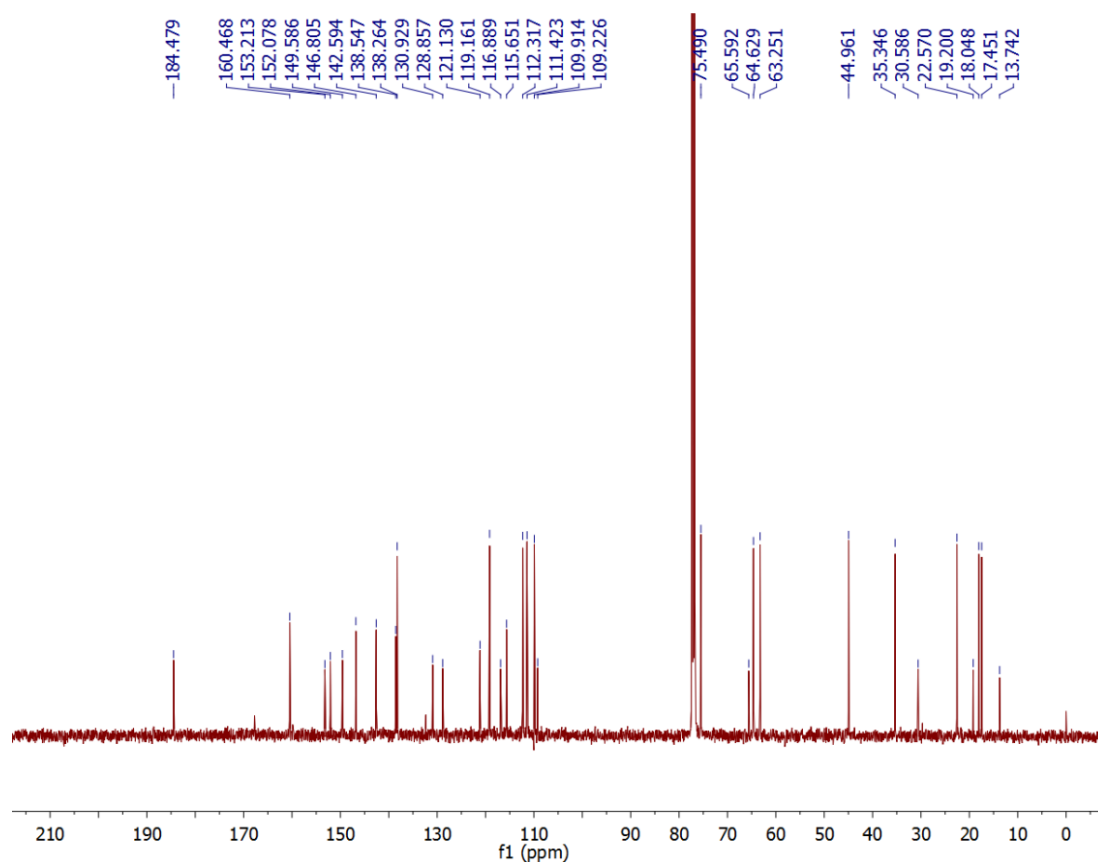**Figure S12.** DEPT 135 (125 MHz,  $\text{CDCl}_3$ ) spectrum of compound **2**.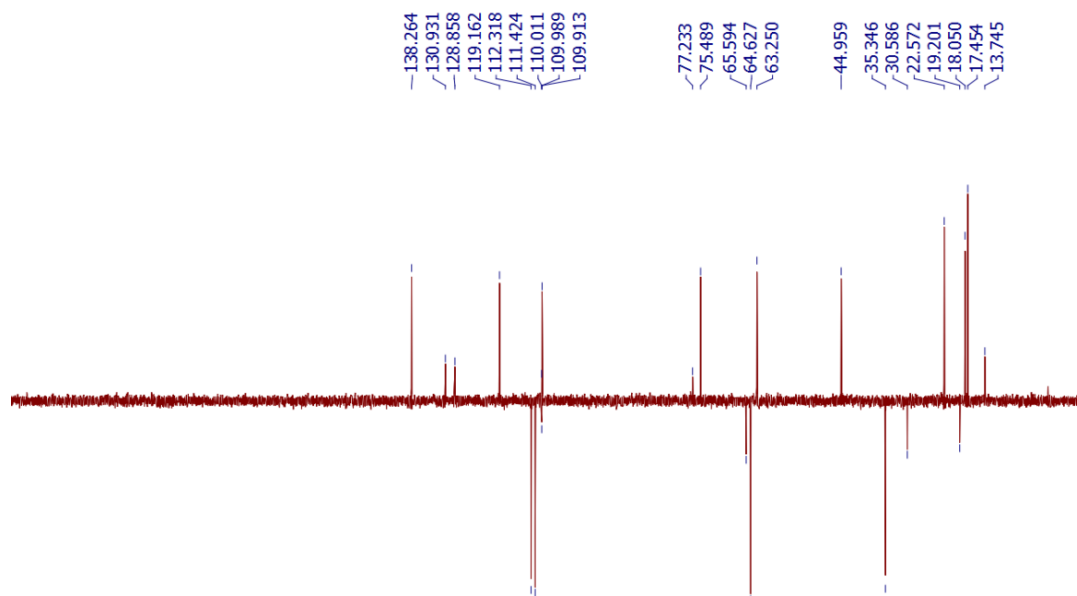

Figure S13. UV spectrum of compound 2.

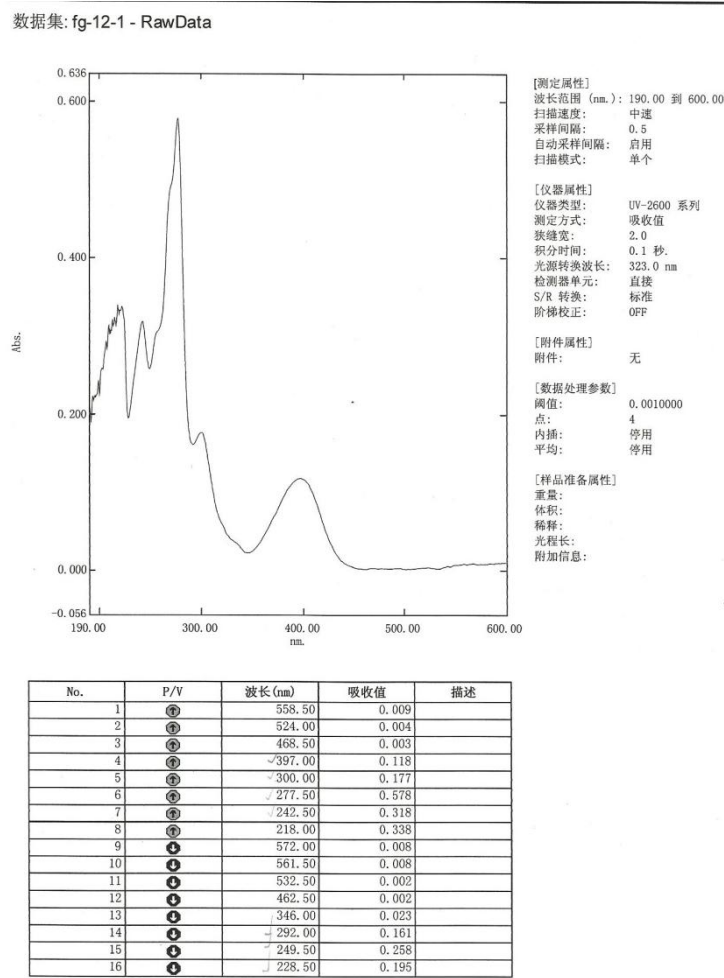

Figure S14. IR spectrum of compound 2.

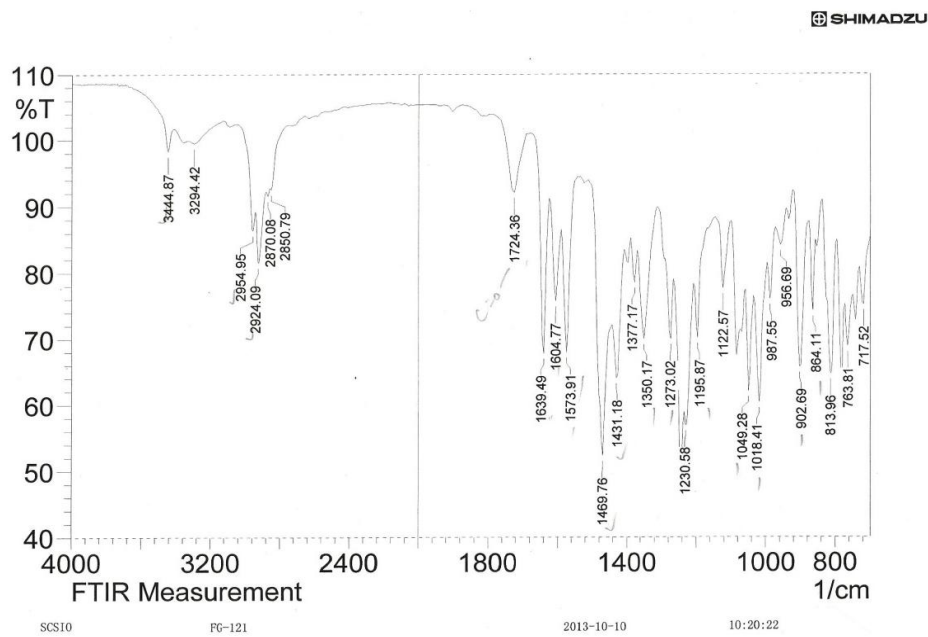



Figure S15. HRESI-MS of compound 2.

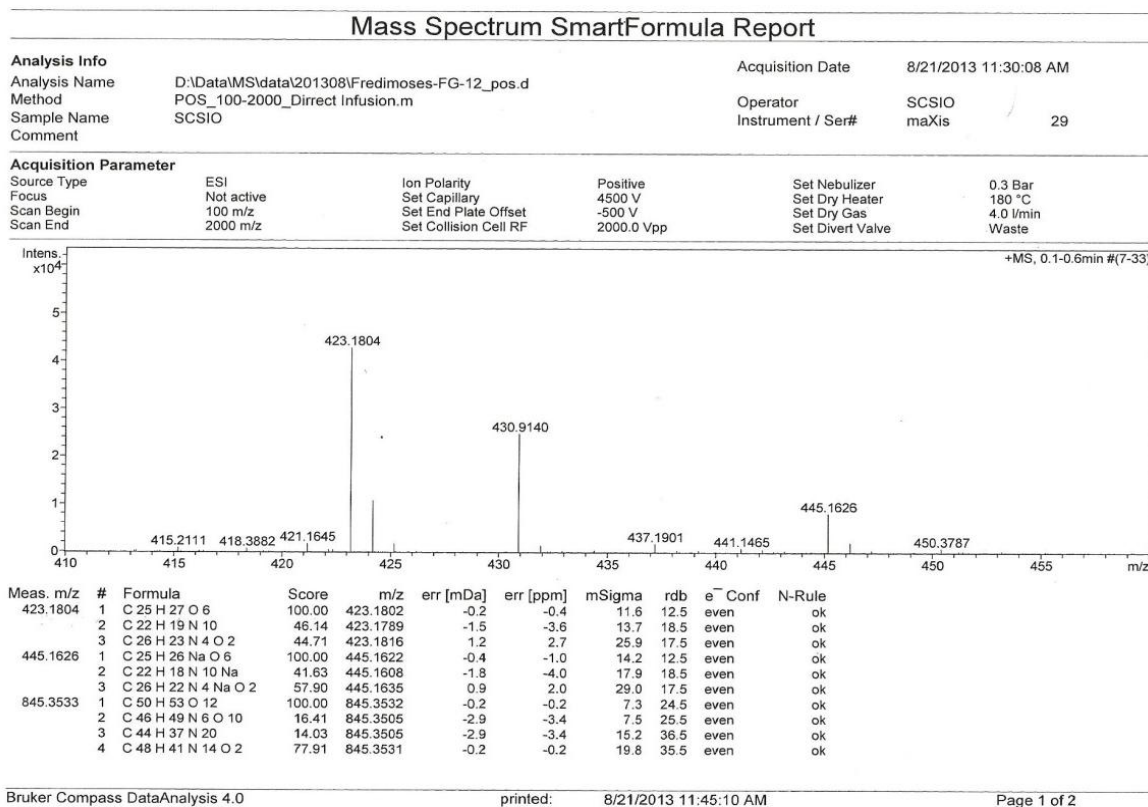Figure S16. <sup>1</sup>H NMR (500 MHz, CDCl<sub>3</sub>) spectrum of compound 3.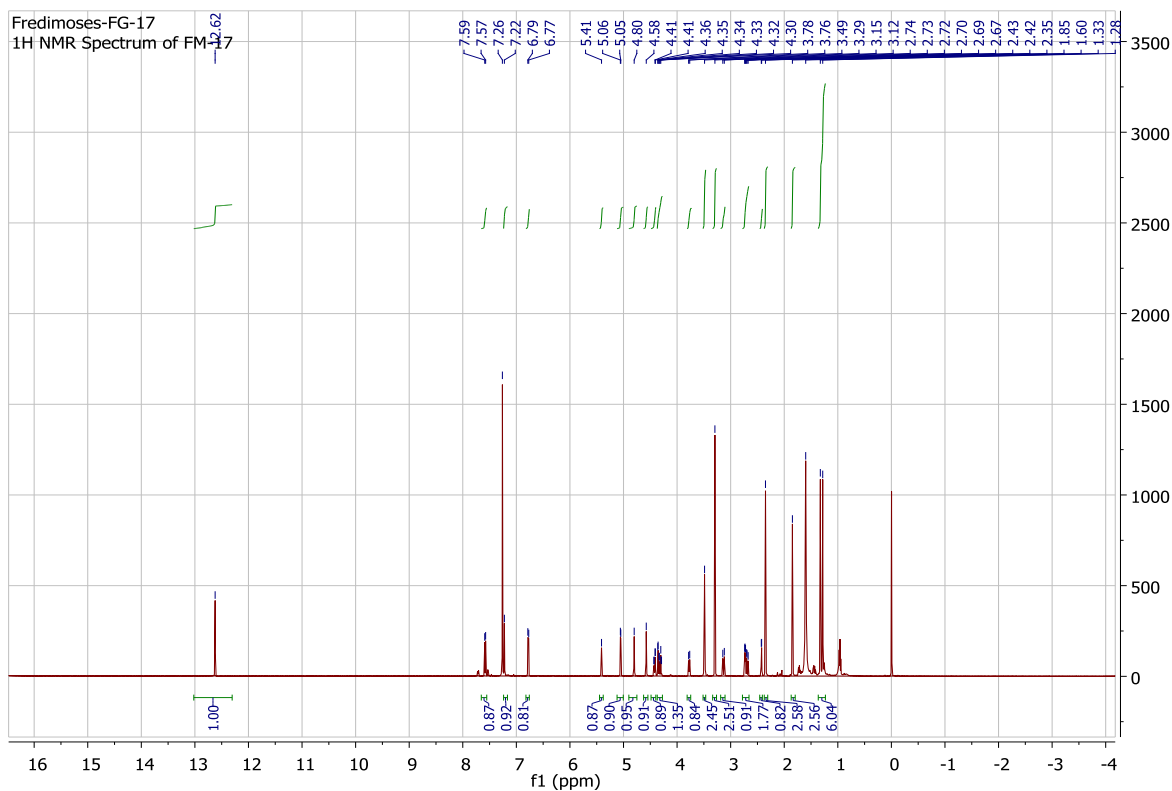

Figure S17. <sup>13</sup>C NMR (125 MHz, CDCl<sub>3</sub>) spectrum of compound 3.

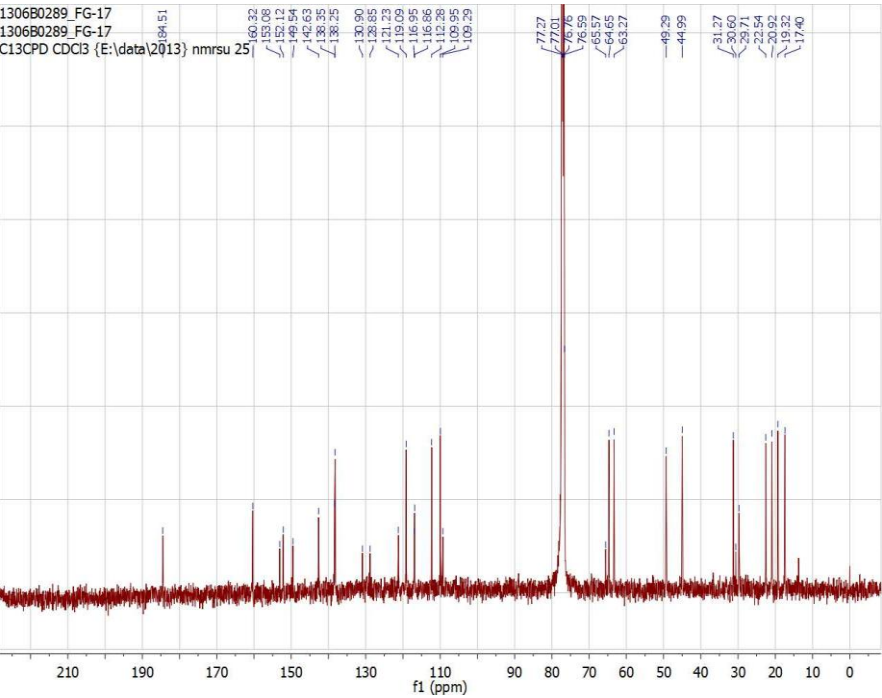

Figure S18. UV spectrum of compound 3.

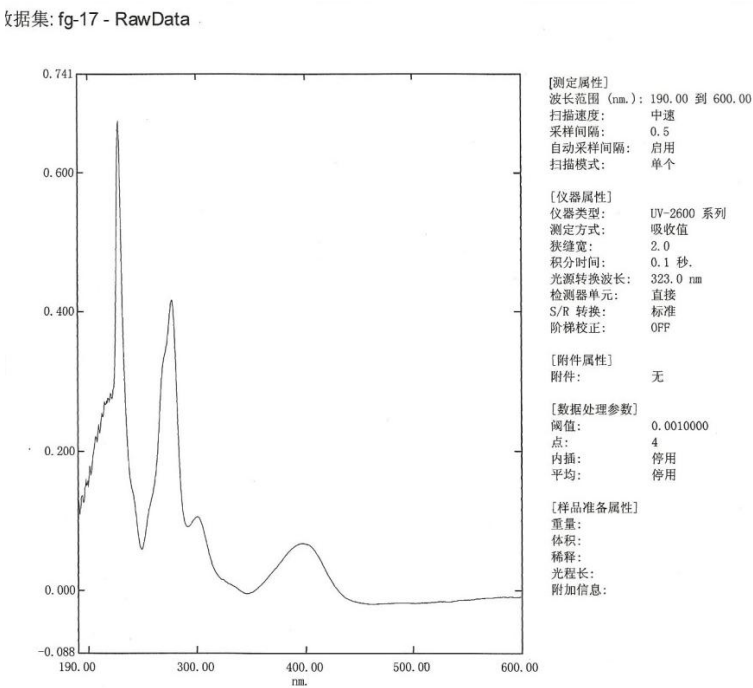

| No. | P/V | 波长 (nm)  | 吸收值    | 描述 |
|-----|-----|----------|--------|----|
| 1   | ⑤   | ✓ 398.50 | 0.068  |    |
| 2   | ⑤   | ✓ 300.50 | 0.106  |    |
| 3   | ⑤   | ✓ 277.50 | 0.417  |    |
| 4   | ⑤   | ✓ 228.00 | 0.672  |    |
| 5   | ⑤   | 532.00   | -0.016 |    |
| 6   | ⑤   | 502.00   | -0.018 |    |
| 7   | ⑤   | 463.00   | -0.019 |    |
| 8   | ⑤   | 346.50   | -0.004 |    |
| 9   | ⑤   | ✓ 291.50 | 0.092  |    |
| 10  | ⑤   | ✓ 249.00 | 0.060  |    |

Figure S19. IR spectrum of compound 3.

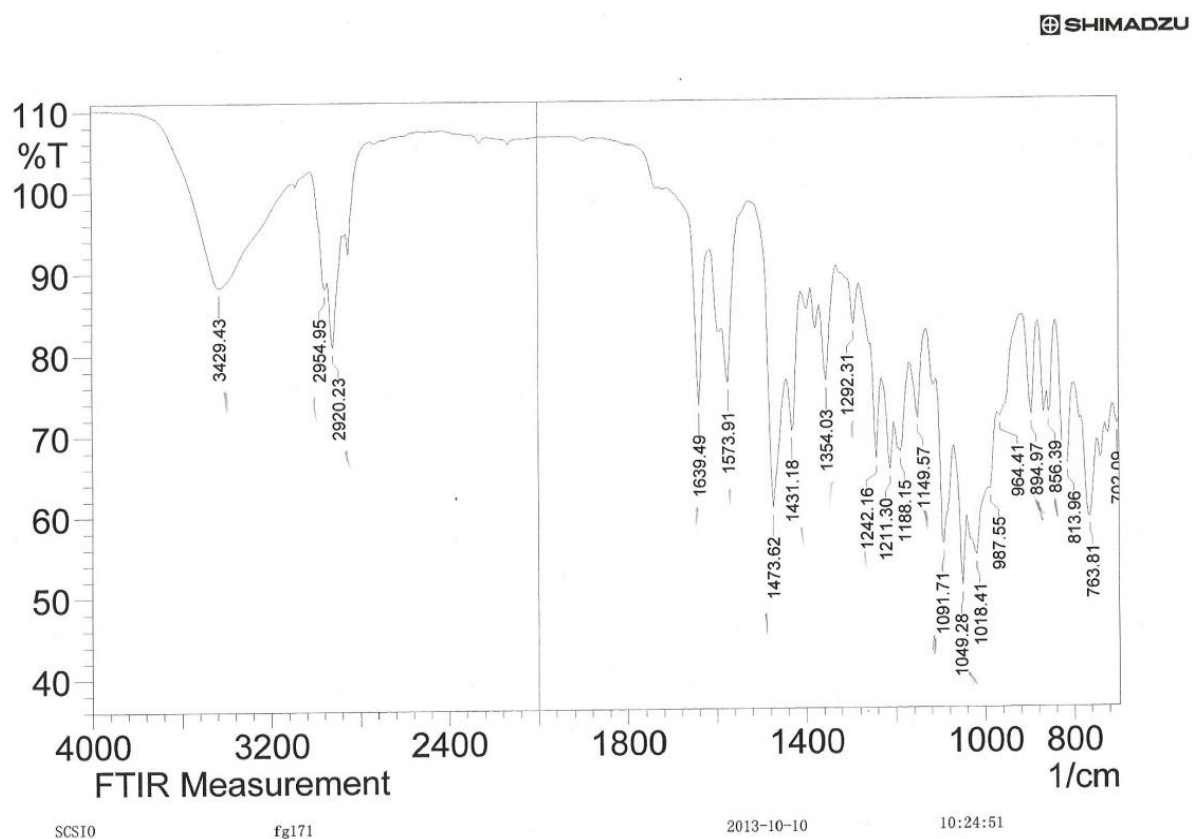

Figure S20. HRESI-MS of compound 3.

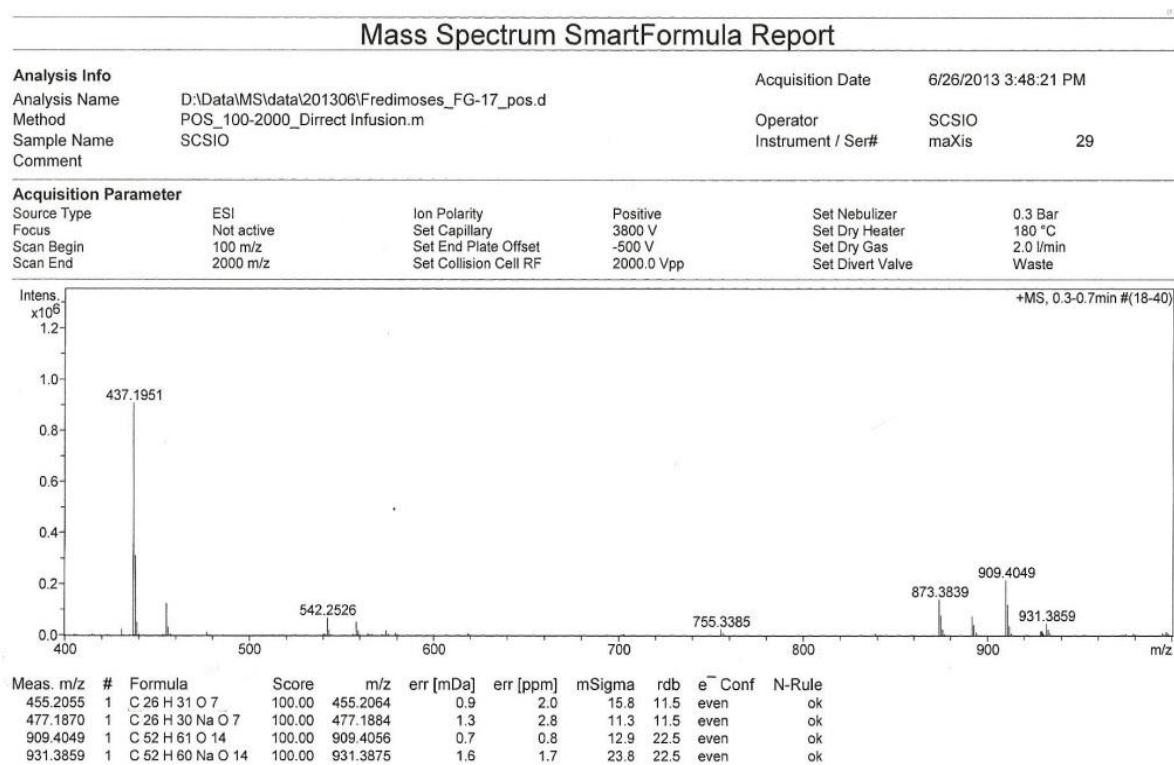

**Figure S21.**  $^1\text{H}$  NMR (500 MHz,  $\text{CDCl}_3$ ) spectrum of compound 4.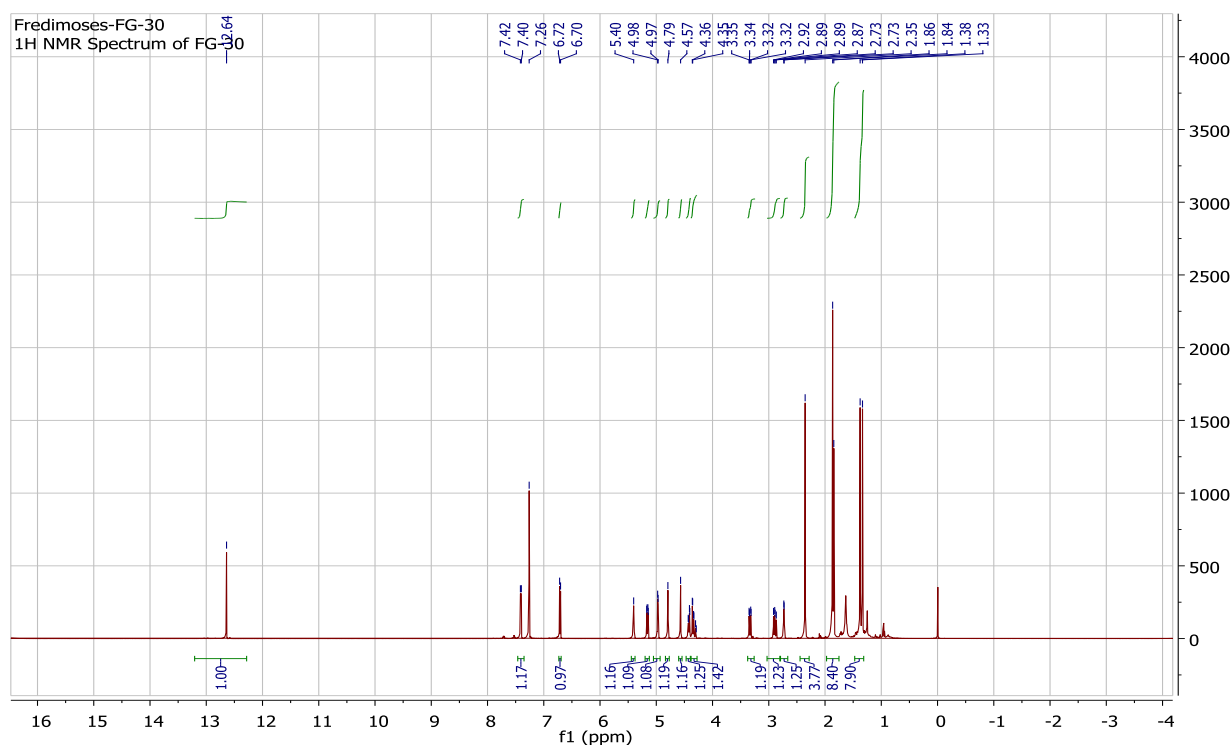**Figure S22.**  $^{13}\text{C}$  NMR (125 MHz,  $\text{CDCl}_3$ ) spectrum of compound 4.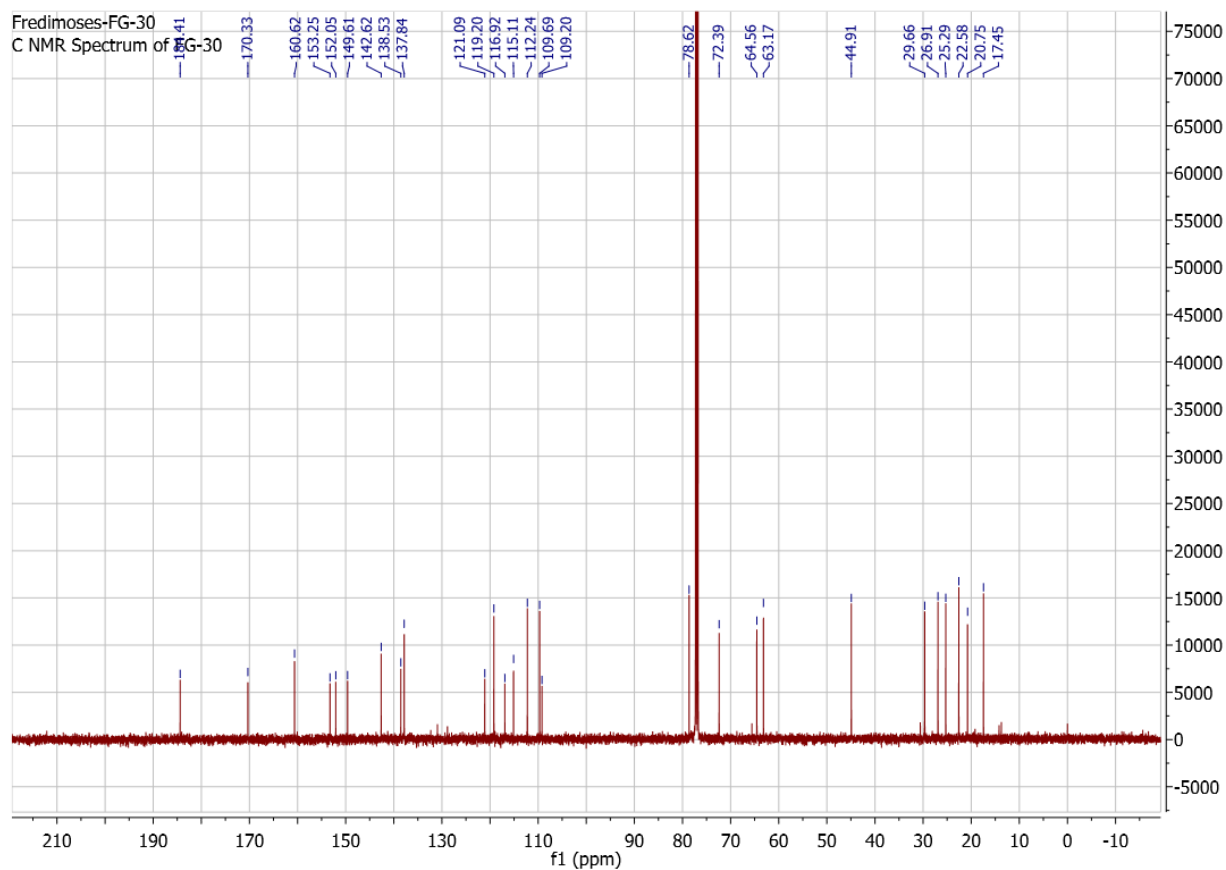

**Figure S23.** Dept 135 (125 MHz, CDCl<sub>3</sub>) spectrum of compound 4.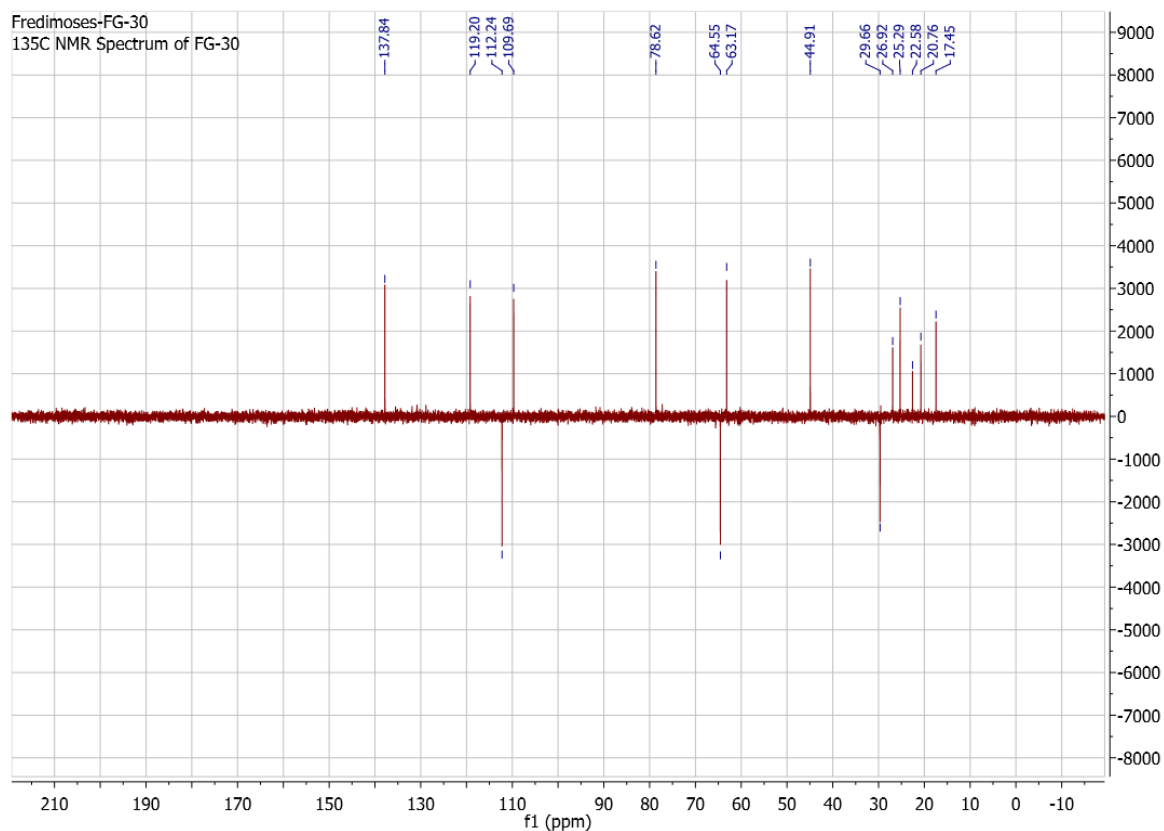**Figure S24.** HSQC spectrum of compound 4.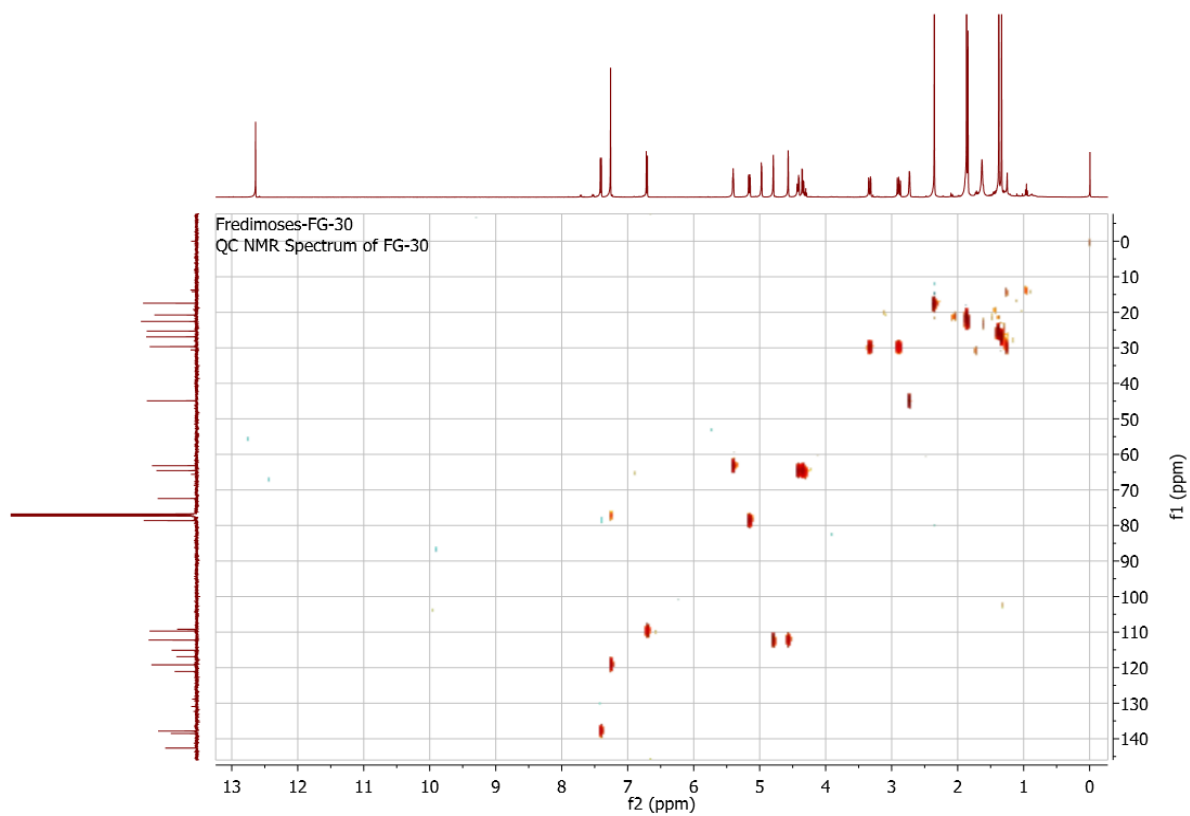

Figure S25. HMBC spectrum of compound 4.

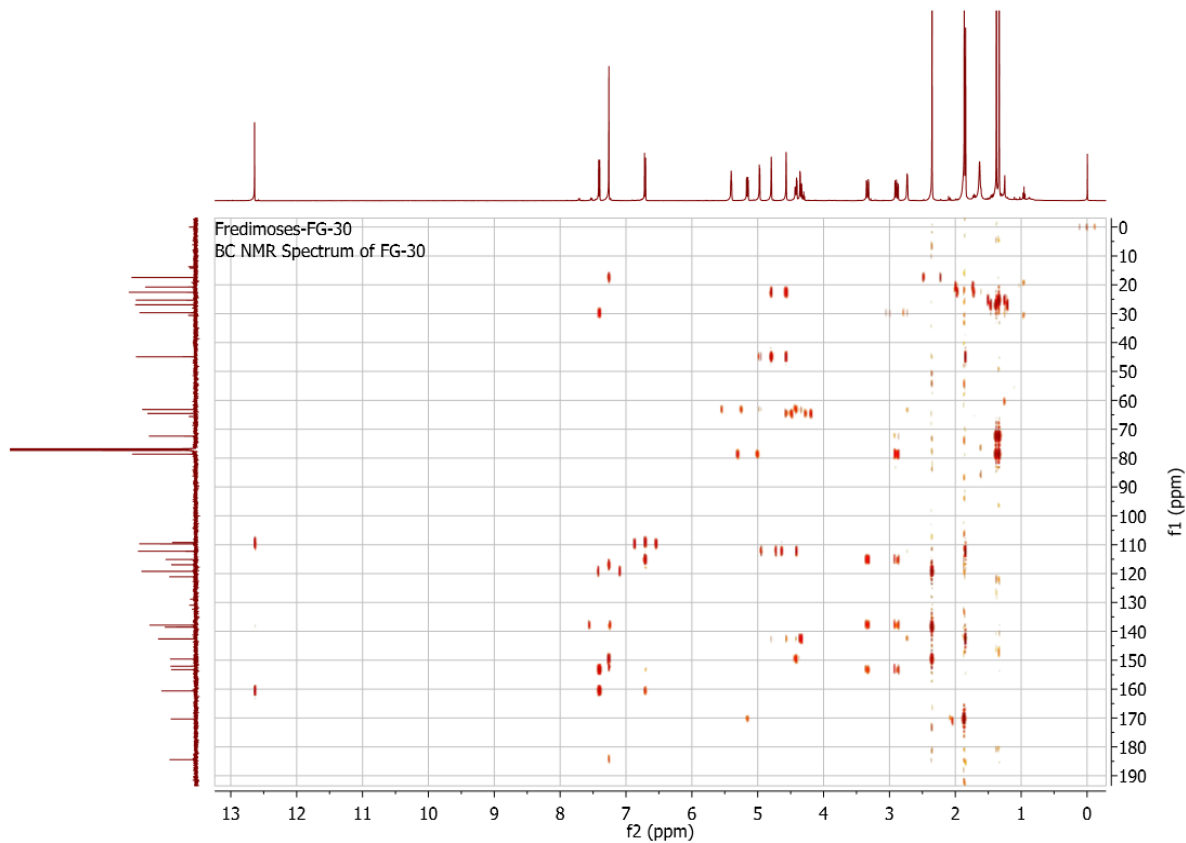

Figure S26. UV spectrum of compound 4.

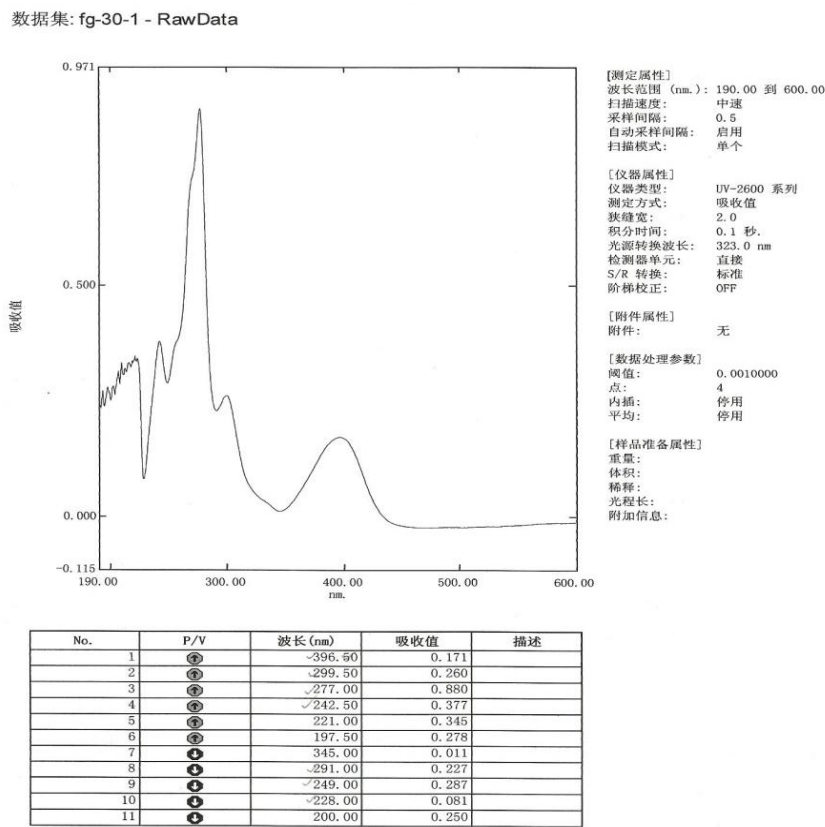

Figure S27. IR spectrum of compound 4.

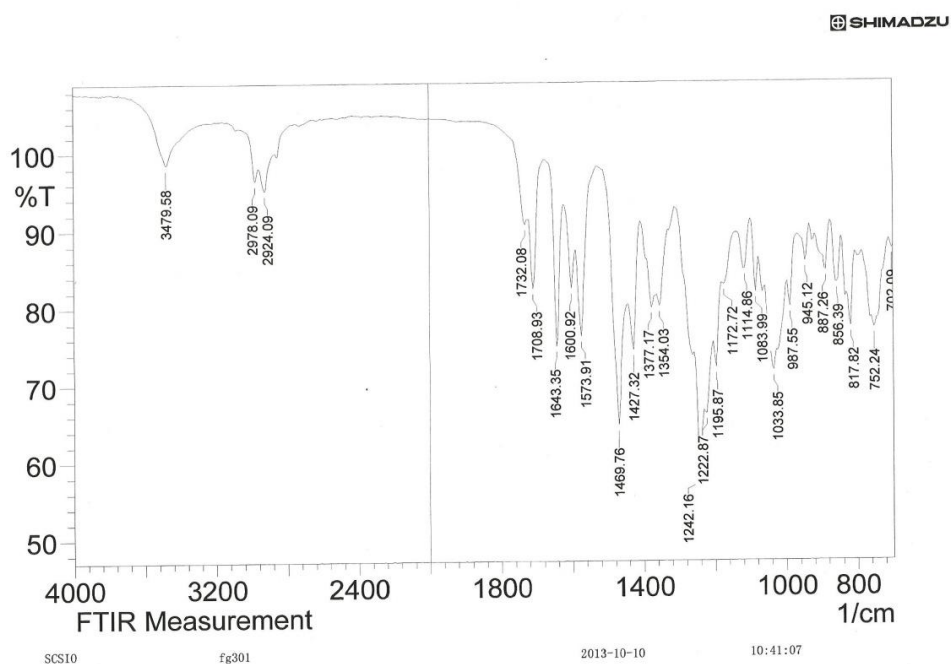

Figure S28. HRESI-MS of compound 4.

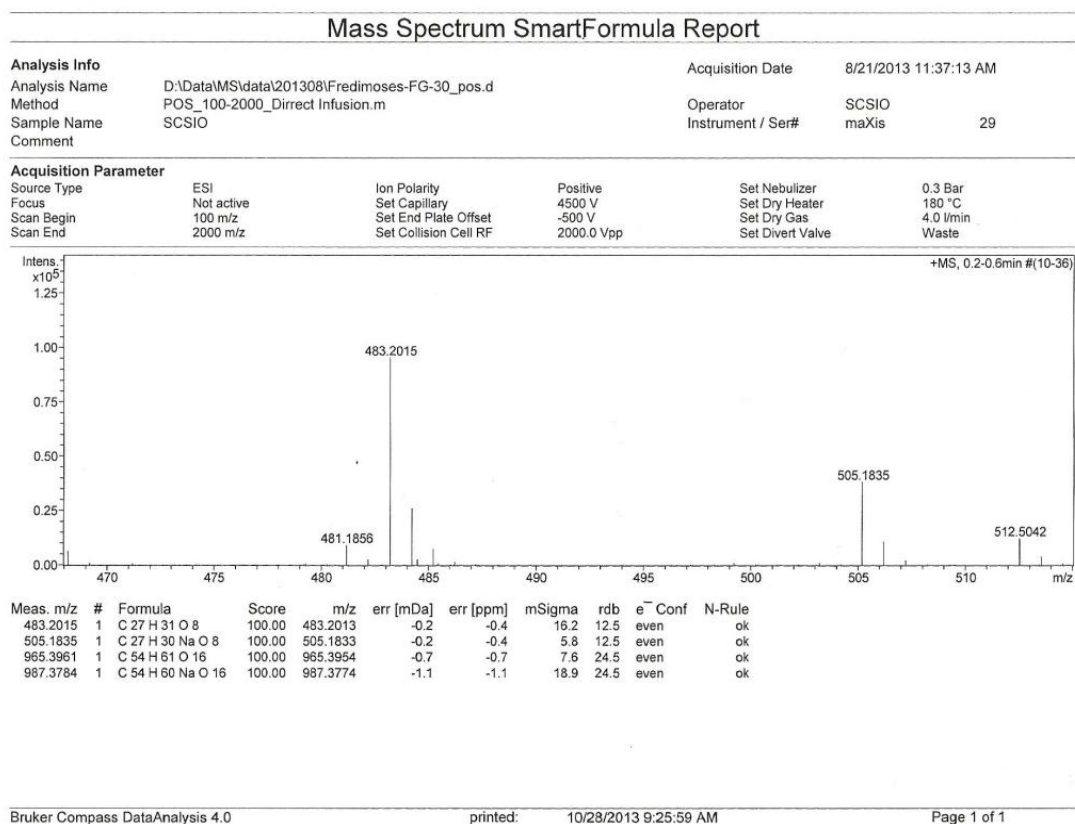

Supplement: s1 [file s1]
